## **Skin Pigmentation and Pulse Oximeter Accuracy in the Intensive Care Unit: a Pilot Prospective Study**

Ashraf Fawzy, MD, MPH<sup>1</sup>; Harith Ali, MD<sup>1</sup>; Peter H. Dzedzic, MS<sup>2</sup>; Niteesh Potu, MS<sup>2</sup>; Eusebia Calvillo, ADN, RN, CCRP<sup>2</sup>; Sherita H. Golden MD, MHS<sup>3</sup>; Theodore J. Iwashyna, MD, PhD<sup>1,4</sup>; Jose I. Suarez, MD<sup>2,5</sup>; David N. Hager, MD, PhD<sup>1</sup>; Brian T. Garibaldi, MD, MEHP<sup>1</sup>

<sup>1</sup> Division of Pulmonary and Critical Care, Johns Hopkins University School of Medicine, Baltimore, MD

<sup>2</sup> Department of Neurology, Johns Hopkins University School of Medicine, Baltimore, MD

<sup>3</sup> Division of Endocrinology, Diabetes and Metabolism and Office of Diversity, Inclusion, and Health Equity, Johns Hopkins Medicine, Baltimore, MD

<sup>4</sup> Department of Health Policy and Management, Bloomberg School of Public Health, Johns Hopkins University, Baltimore, MD

<sup>5</sup> Division of Neurosciences Critical Care, Department of Anesthesiology and Critical Care Medicine, Johns Hopkins University School of Medicine, Baltimore, MD

### Corresponding Author:

Ashraf Fawzy, MD, MPH  
5501 Hopkins Bayview Circle  
Baltimore, MD 21224  
[afawzy1@jhmi.edu](mailto:afawzy1@jhmi.edu)

Funding: This work was supported by funding from John Hopkins inHealth (the Johns Hopkins Precision Medicine initiative) and the John Templeton Foundation. AF is supported by NIH National Heart, Lung, and Blood Institute (NHLBI) grant K23HL151758.

## **Abstract**

Rationale: Despite multiple reports of pulse oximeter inaccuracy among hospitalized Black individuals, regulatory testing of pulse oximeters is performed on healthy volunteers.

Objective: Evaluate pulse oximeter accuracy among intensive care unit patients with diverse skin pigmentation.

Methods: Skin pigmentation was measured using a chromameter in 12 patients and individual typology angle (ITA), a measure of constitutive pigmentation, calculated. Arterial blood gas (ABG) arterial oxygen saturation ( $\text{SaO}_2$ ) sampling was precisely matched to pulse oximetry ( $\text{SpO}_2$ ) using arterial line waveforms analysis. Error ( $\text{SpO}_2\text{-SaO}_2$ ), bias, and average root mean square error ( $A_{\text{RMS}}$ ) were calculated. Multivariable linear mixed effects models evaluated the association of  $\text{SpO}_2\text{-SaO}_2$  with skin pigmentation.

Measurements and Main Results: Sampling time was determined for 350 ABGs. Five participants (N=96 ABGs) were darkly pigmented (forehead  $\text{ITA} < -30^\circ$ ), and 7 lighter pigmented (N=254 ABGs). Darkly pigmented individuals had 1.05% bias and 4.15%  $A_{\text{RMS}}$  compared to 0.34% bias and 1.97%  $A_{\text{RMS}}$  among lighter pigmented individuals. After adjusting for  $\text{SaO}_2$ , pH, heart rate, and mean arterial pressure,  $\text{SpO}_2\text{-SaO}_2$  was falsely elevated by 1.00% more among darkly pigmented individuals (95% confidence interval: 0.25-1.76%).  $\text{SpO}_2$  significantly overestimated  $\text{SaO}_2$  for dark, brown, and tan forehead or forearm pigmentation and brown and tan finger pad pigmentation compared to intermediate/light pigmentation.

Conclusions: The pulse oximeter in clinical use at an academic medical center performed worse in darkly pigmented critically ill patients than established criteria for FDA clearance. Pulse oximeter testing in ICU settings is feasible, and could be required by regulators to ensure equivalent device performance by skin pigmentation among patients.

## Introduction

The US Food and Drug Administration (FDA) currently requires medical-grade pulse oximeters be tested on at least 10 unique individuals, with a suggestion that the test sample should include at least 2 darkly pigmented subjects (or 15% of the subject pool, whichever is larger).(1) These individuals need to contribute 200 or more paired oxyhemoglobin saturation measurements from the pulse oximeter ( $SpO_2$ ) and an arterial blood sample ( $SaO_2$ ). The FDA clearance threshold is an average root mean square error ( $A_{RMS}$ )  $\leq 3.0\%$  for transmittance, wrap, or finger clip oximeters or  $\leq 3.5\%$  for ear clip or reflectance oximeters. Existing FDA regulatory submissions have exclusively used desaturation testing in healthy volunteers in laboratory settings.(2, 3) Pulse oximeters are intended for clinical use in individuals experiencing acute and/or chronic illness.

The accuracy of pulse oximeters has been questioned,(4) with recurring concern for poor performance among individuals who are darkly pigmented.(5–8) Recent studies showed that pulse oximeters commonly overestimate  $SaO_2$  among Black and Hispanic patients leading to unrecognized or “occult” hypoxemia.(9–12) Unrecognized hypoxemia is associated with delay in delivering COVID-19 therapy and higher readmission rate among COVID-19-infected patients.(13, 14)

However, past clinical studies have major limitations. First, race and ethnicity as recorded in the electronic medical record (EMR) was used as a surrogate for skin pigmentation, the presumed relevant physiologic parameter. Second, manually entered arterial blood gas (ABG) results and corresponding  $SpO_2$  readings are obtained from the EMR, with paired  $SpO_2$ - $SaO_2$  values occurring up to 10 minutes apart.(15) Some have argued this creates uncertainty if whether  $SpO_2$  readings that are paired to  $SaO_2$  measurements accurately reflect the same physiologic state given ongoing care.(16)

This prospective study addresses the limitations of prior retrospective studies by objectively measuring skin pigmentation and identifying pulse oximeter readings at the exact

time of ABG collection to evaluate whether pulse oximeter accuracy differs by skin pigmentation in a sample of critically ill patients hospitalized at a single center. The sample was chosen to be larger than that required for FDA premarket notification submission.(1)

## Methods

### *Subjects and Measurements*

Patients in the Johns Hopkins Hospital (JHH) adult medical intensive care unit (ICU) who had an arterial catheter were prospectively recruited. The Johns Hopkins University Institutional Review Board approved this study and informed consent was obtained before data collection (IRB#00318076). Skin pigmentation was measured at the time of study enrollment according to the Commission Internationale de l'Eclairage (CIE) L\*a\*b\* coordinates (L\*=black/white, a\*=red/green, b\*=yellow/blue) using the Konica Minolta CR-400 chromameter (Ramsey, NJ) at the forehead, forearm, and finger pad.(17) Three consecutive measurements were taken at each site and averaged. Left and right finger pad values were combined for each individual by averaging the values from both hands.

Concurrent SaO<sub>2</sub> and SpO<sub>2</sub> were gathered from patients' entire hospitalization. ABG samples were analyzed on an ABL825 or ABL827 blood gas analyzer (Radiometer America, Brea, CA) and functional SaO<sub>2</sub> determined by co-oximetry. Pulse oximetry was measured using the Masimo SET LNCS Neo-3 wrap sensor (Irvine, CA) connected to a GE Carescape B850 monitor (Chicago, IL) with E-MASIMO-00 Module. The Masimo LNCS TC-I reusable ear clip sensor was also available but intended only for short-term monitoring.

Vital sign data, including SpO<sub>2</sub>, was recorded at 2 second intervals, and waveforms for both the arterial line and pulse oximeter (photoplethysmography) were visually inspected in the Sickbay™ Platform (Houston, TX). The period of ABG sampling was determined by a physician (A.F. or H.A.) through visual identification of a dampened arterial line waveform proximate to EMR-recorded ABG collection time (**Supplementary Figure 1**). Readers were blinded to

participant race and skin pigmentation. Photoplethysmography waveform amplitude was subjectively assessed as 'poor', 'variable', or 'good' (**Supplementary Figure 2**).

For each ABG, the corresponding SpO<sub>2</sub> value was the median SpO<sub>2</sub> during ABG sampling as determined by dampening of the arterial waveform. The median heart rate from pulse oximetry was determined during ABG sampling and median mean arterial pressure was determined from the arterial line 60-120 seconds before or after ABG sampling. Occult hypoxemia was defined as SaO<sub>2</sub><88% with concurrent SpO<sub>2</sub>≥92%.

### *Statistical Analysis*

The individual typology angle (ITA), a measure of constitutive skin pigmentation,(18) was calculated from the L\* and b\* CIE coordinates as  $[\arctan(L^*-50)/b^*]]*(180/\pi)$  separately for each participant and anatomic site.(17) Participants were categorized for the primary analysis based on forehead ITA as darkly pigmented if calculated ITA was less than -30° and lighter pigmented otherwise.(17)

Error was calculated as the difference between SpO<sub>2</sub> and SaO<sub>2</sub> (SpO<sub>2</sub>-SaO<sub>2</sub>). The bias (mean difference;  $\sqrt{(\text{SpO}_2-\text{SaO}_2)/N}$ ) and A<sub>RMS</sub> ( $\sqrt{[(\text{SpO}_2-\text{SaO}_2)^2]/N}$ ) were calculated according to the International Organization for Standardization (ISO) document 80601-2-61:2011.(1, 19) Bootstrapping with 10,000 sampling replications for each skin pigmentation category was used for statistical comparison of the A<sub>RMS</sub>.(20) Separate linear mixed effects models were constructed for SpO<sub>2</sub>-SaO<sub>2</sub> with skin pigmentation category or forehead, forearm, or finger pad ITA as the independent variable accounting for repeated measures within subject. Non-linear associations were tested retaining quadratic and cubic terms when statistically significant (p<0.05). Multivariable models controlled for SaO<sub>2</sub>, pH, heart rate, and mean arterial pressure. Marginal effects from transition of intermediate/light pigmentation (ITA=41°) to the midpoint of tan (ITA=19°), brown (ITA=-10°) and dark (ITA=-45°) pigmentation were calculated.

A secondary analysis excluded lower quality SpO<sub>2</sub> values defined as SpO<sub>2</sub>-SaO<sub>2</sub> pairs where the range (defined as maximum-minimum) of SpO<sub>2</sub> was >1% for 30 seconds or the duration of blood sampling, whichever was longer, or where the photoplethysmography tracing was categorized as 'poor'. An alternative analysis was performed using the closest SpO<sub>2</sub> value within 10 seconds of the time SaO<sub>2</sub> was recorded in the EMR. Analyses were conducted using SAS 9.4 (Carey, NC).

## Results

Twelve individuals were enrolled during their ICU stay from June to October 2022. Five were darkly pigmented and seven lighter pigmented based on forehead pigmentation measurement. Darkly pigmented individuals had a median age of 54 years (range: 42.9-70.2), 2 (40%) were female, and all were identified as non-Hispanic Black in the EMR. Lighter pigmented individuals had a median age of 64.8 (range: 34.7-79.4), 4 (57.1%) were female, and one was identified as Asian whereas the remainder were identified as non-Hispanic White in the EMR. Median forehead ITA was -46.2° for darkly pigmented individuals (range: -52.5° to -42.0°) and 12.6° for lighter pigmented individuals (range: -6.3° to 48.3°). The distribution of pigmentation was similar at the forearm but differed at the finger pad (**Figure 1**).

Four hundred ABGs were collected during routine clinical care (119 ABGs for darkly pigmented individuals and 281 for lighter pigmented individuals) with a median of 24 ABGs for darkly pigmented individuals (range: 2-49) and 12 ABGs for lighter pigmented individuals (range: 1-129). Fifty observations were excluded from the primary analysis when a corresponding SpO<sub>2</sub> could not be identified because at the time of ABG the participant was not in an ICU, an SpO<sub>2</sub> value was not available, or the arterial line tracing was absent/non-pulsatile. There were 350 ABGs (96 in darkly pigmented participants, 254 in lighter pigmented participants) where the blood sampling time could be identified and corresponding SpO<sub>2</sub> measurements were available. Notably, the median duration between the ABG time recorded in

the EMR and the exact time of ABG sampling obtained from assessing the arterial line tracing was 77.5 seconds (interquartile range: 39.6-123.8 seconds), ranging to over 10 minutes (618.2 seconds) away. SpO<sub>2</sub><90% was more common among darkly pigmented individuals than lighter pigmented individuals (5.2% vs 1.6%) and poor plethysmography quality was rare (**Table 1**).

Overall, pulse oximeter bias was 0.62% and the A<sub>RMS</sub> was 2.75%. However, among darkly pigmented individuals pulse oximeter bias was 1.05% and the A<sub>RMS</sub> was 4.15%—substantially higher than for lighter pigmented individuals (bias 0.34% and A<sub>RMS</sub> 1.97%). The 95% CI for A<sub>RMS</sub> from 10,000 bootstrap was 2.35-5.72% for darkly pigmented individuals and was significantly higher than 1.76-2.17% for lighter pigmented individuals (p<0.0001). Occult hypoxemia was present in 2.1% of sample pairs of darkly pigmented participants compared with 0.4% of sample pairs in lighter pigmented participants. Pulse oximeter error for darkly pigmented participants increased as SaO<sub>2</sub> decreased, with median (range, N) SpO<sub>2</sub>-SaO<sub>2</sub> of 2.5% (0.8%-7.0%, N=11) for SaO<sub>2</sub> 90-94% and 10.0% (0.2%-14.5%, N=5) for SaO<sub>2</sub><90%, unlike in lighter pigmented participants (**Figure 2**).

In regression analysis, controlling for SaO<sub>2</sub>, pH, heart rate, and mean arterial pressure, the error of the pulse oximeter (SpO<sub>2</sub>-SaO<sub>2</sub>) was on average 1.00% higher for darkly pigmented individuals compared with lighter pigmented individuals (95% CI: 0.25-1.76%). A 10° reduction in forearm ITA (darker pigmentation) was associated with a 0.19% increase in SpO<sub>2</sub>-SaO<sub>2</sub> (95% CI: 0.10-0.29%). Associations of pulse oximeter accuracy with forehead and finger pad skin pigmentation were non-linear but demonstrated significant overestimation of SaO<sub>2</sub> by SpO<sub>2</sub> for dark, brown, and tan forehead pigmentation and brown and tan finger pad pigmentation (**Figure 3**). The marginal difference compared to intermediate/light pigmentation was 2.40% (95% CI: 1.69-3.12%) for dark, 2.92% (95% CI: 2.11-3.74%) for brown, and 1.80% (95% CI: 1.24-2.35%) for tan forehead pigmentation and 0.99% (95% CI: 0.58-1.40%) for brown and 0.43% (95% CI: 0.25-0.60%) for tan finger pad pigmentation.

In sensitivity analyses excluding lower quality SpO<sub>2</sub> readings (remaining N=73 darkly pigmented and N=203 lighter pigmented), the overall bias and A<sub>RMS</sub> improved to 0.59% and 2.37% respectively, however the difference in performance between darkly pigmented and lighter pigmented individuals persisted: 1.13% bias and 3.44% A<sub>RMS</sub> for darkly pigmented compared to 0.08% bias and 1.83% A<sub>RMS</sub> for lighter pigmented individuals. Multivariable regression results were unchanged (**Supplementary Figure 3**). In the alternative analysis that considered 360 SpO<sub>2</sub> values within 10 seconds of the recorded SaO<sub>2</sub> time in the EMR (N=100 darkly pigmented, N=260 lighter pigmented) the overall bias was 0.63% and A<sub>RMS</sub> was 2.98% with bias and A<sub>RMS</sub> of 1.05% and 4.59% respectively for darkly pigmented individuals compared to 0.36% and 2.05% for lighter pigmented individuals.

## Discussion

This is the first real-world clinical study using objectively measured skin pigmentation and precise identification of SpO<sub>2</sub>-SaO<sub>2</sub> pairs to evaluate the accuracy of pulse oximetry in critically ill adult patients with varying skin tone. The FDA-cleared pulse oximeter evaluated in this study performed worse in darkly pigmented individuals and would not meet established criteria for FDA clearance (A<sub>RMS</sub><3.0%) among critically ill patients with dark skin pigmentation. Conversely, among critically ill patients with lighter skin pigmentation, the pulse oximeter met the FDA's performance standard. Importantly, increased pulse oximeter error among darkly pigmented individuals was independent of underlying saturation level, acidosis, heart rate, and blood pressure, all of which may compound pulse oximeter error. The study's sample size meets the current threshold for premarket notification submission for FDA clearance.

This study substantially improves on prior investigations by (1) objectively measuring skin pigmentation rather than relying on race/ethnicity designations in the EMR, (2) leveraging arterial line waveforms to precisely identify the exact time of ABG sampling, and (3) using high-



resolution vital sign data to pair ABGs with concurrent SpO<sub>2</sub> data. This methodologic approach pairs the vast majority (87.5%) of clinical SaO<sub>2</sub> measurements with SpO<sub>2</sub> measurements, unlike some EMR studies.(13) Examining arterial waveform tracings also revealed that the recorded SaO<sub>2</sub> time in the EMR was often a minute before or after the actual time of blood sampling, with a quarter of samples over 2 minutes away. Taken together, the inaccuracy of recorded SaO<sub>2</sub> time and window for SpO<sub>2</sub> could have acted as compounding biases in past studies, albeit likely towards underestimating racial disparities.(15) Here, definitively overcoming the potential biases in prior retrospective studies in critically ill patients, the conclusion that pulse oximeters more commonly overestimate oxygen saturation in darkly pigmented individuals is corroborated by this study.

Most recent studies investigating the impact of skin pigmentation on pulse oximeter accuracy among adults in clinical settings have substituted race and ethnicity for objective skin tone measurements.(9–15, 21–23) Laboratory studies of healthy volunteers that subjectively evaluated skin pigmentation have reported poor accuracy at low saturations (<80%) among darkly pigmented individuals compared with lighter pigmented individuals.(7, 8) However, a re-analysis of proprietary healthy volunteer laboratory data reported no difference in pulse oximeter accuracy between Black and White volunteers.(2) This is at odds with the findings of this study and a recent pre-print of work of commercial pulse oximeters with objectively measured skin pigmentation.(3) Early studies using subjective skin pigmentation scales noted that pulse oximeters were less accurate and less reliable among darkly pigmented individuals undergoing cardiopulmonary exercise testing or in the ICU.(5, 24) A study of 100 darkly pigmented South African patients in the ICU found acceptable precision and bias for four oximeters, however, only 5 samples had oxygen saturations  $\leq 92\%$ .(25) In the modern era, a small study of hypoxemic infants with cyanotic congenital heart disease noted poor oximeter performance unrelated to visually assessed skin pigmentation,(26) though routine overestimation of oxygen

saturation by pulse oximeters in this chronically hypoxic population is common.(27, 28) One study of adult patients in two ICUs in Australia and New Zealand found that darkly pigmented patients experienced significantly more overestimation by pulse oximetry compared with lighter pigmented patients.(29)

By objectively measuring skin pigmentation using a hand-held chromameter, we avoid introduction of subjective biases when visually assessing skin pigmentation using a skin tone scale.(3) Although skin pigmentation measurements at the forehead and forearm were best at distinguishing between darkly pigmented and lighter pigmented individuals, finger pad pigmentation was also strongly associated with pulse oximeter error despite lighter pigmentation and greater overlap between darkly and lighter pigmented individuals. Capturing finger pigmentation using a visual scale may be more difficult and less accurate, but findings from this study show similar results regardless of where skin pigmentation is assessed; the generalizability of this to other clinical settings needs to be confirmed.

Although this study addresses prior investigations' methodologic shortcomings, limitations remain. Manually judging exact start and stop times of ABG sampling from arterial line tracings introduces subjectivity — though differences in judgement are likely to be on the order of milliseconds and raters were blinded to the skin pigmentation of the patients whose waveforms were being evaluated, limiting the risk of differential error. The arterial line may also have been accessed for a prolonged period to obtain blood tests in addition to the ABG. Since the ABG sampling is not directly observed, pulse oximeter placement on the participant's body is unknown, and the wrap sensor could have been placed on a finger, toe, or ear. As this study relies on clinical data, the distribution of oxygen saturation is heavily skewed toward higher values though this tends to be the range where pulse oximeters are most accurate and would have biased results toward the null. Due to the relatively small patient sample size as currently suggested by the FDA, non-pigment patient level factors could not be included in multivariable

assessment and effect modification could not be assessed. Finally, this study only evaluated a single pulse oximeter model and may not be generalizable to other FDA-cleared oximeters.

### *Policy Implications*

Updated guidelines for regulatory clearance of pulse oximeters could ensure that darkly pigmented subjects whose objectively measured skin tone falls within predefined criteria are included with sufficient power to detect differences in device performance within this group. Furthermore, device testing in the real-world setting is imperative as there are substantial physiologic and perfusion differences between healthy volunteers and individuals with acute or chronic illness. This study serves as a framework for larger future studies testing existing and emerging pulse oximeters using methods that objectively quantify skin pigmentation. It also provides a reproducible framework for leveraging a remote vital sign monitoring system and high-resolution data repository to capture hypoxic events in the clinical setting with lower participant and staff burden. In contrast, a prospective study that solely relies on direct observation of clinical ABGs and research ABGs guided by pulse oximeter readings will invariably miss many instances of occult hypoxemia. In addition, the exclusive use of clinical data in this study most closely reflects real-world use of pulse oximeters whereas the presence of research staff and additional scrutiny at the time of ABG sampling could lead to bias.

### *Conclusion*

In conclusion, using high-resolution clinical data from a diverse sample of intensive care unit patients with objectively measured skin pigmentation, pulse oximeter error was greater among darkly pigmented patients. This performance would not meet the Food and Drug Administration's current threshold for regulatory clearance in this population. Furthermore, pulse oximeter inaccuracy varied based on degree of skin pigmentation, independent of other physiologic parameters, demonstrating statistically significant overestimation of true oxygen

saturation among individuals with dark or brown facial or forearm skin and brown or tan finger pad skin.

## References

1. Health C for D and R. Pulse Oximeters - Premarket Notification Submissions [510(k)s]: Guidance for Industry and Food and Drug Administration Staff. 2020;at <<https://www.fda.gov/regulatory-information/search-fda-guidance-documents/pulse-oximeters-premarket-notification-submissions-510ks-guidance-industry-and-food-and-drug>>.
2. Barker SJ, Wilson WC. Racial effects on Masimo pulse oximetry: a laboratory study. *J Clin Monit Comput* 2023;37:567–574.
3. Leeb G, Auchus I, Law T, Bickler P, Feiner J, Hashi S, *et al.* The Performance of 11 Fingertip Pulse Oximeters During Hypoxemia in Healthy Human Subjects with Varied, Quantified Skin Pigment. 2023;doi:10.2139/ssrn.4578562.
4. Louw A, Cracco C, Cerf C, Harf A, Duvaldestin P, Lemaire F, *et al.* Accuracy of pulse oximetry in the intensive care unit. *Intensive Care Med* 2001;27:1606–1613.
5. Jubran A, Tobin MJ. Reliability of Pulse Oximetry in Titrating Supplemental Oxygen Therapy in Ventilator-Dependent Patients. *Chest* 1990;97:1420–1425.
6. Tobin MJ. Respiratory monitoring. *JAMA* 1990;264:244–251.
7. Bickler PE, Feiner JR, Severinghaus JW. Effects of skin pigmentation on pulse oximeter accuracy at low saturation. *Anesthesiology* 2005;102:715–719.
8. Feiner JR, Severinghaus JW, Bickler PE. Dark skin decreases the accuracy of pulse oximeters at low oxygen saturation: the effects of oximeter probe type and gender. *Anesth Analg* 2007;105:S18-23, tables of contents.
9. Sjoding MW, Dickson RP, Iwashyna TJ, Gay SE, Valley TS. Racial Bias in Pulse Oximetry Measurement. *New England Journal of Medicine* 2020;383:2477–2478.
10. Wong A-KI, Charpignon M, Kim H, Josef C, de Hond AAH, Fojas JJ, *et al.* Analysis of Discrepancies Between Pulse Oximetry and Arterial Oxygen Saturation Measurements by

Race and Ethnicity and Association With Organ Dysfunction and Mortality. *JAMA Network Open* 2021;4:e2131674.

11. Valbuena VSM, Barbaro RP, Claar D, Valley TS, Dickson RP, Gay SE, *et al.* Racial Bias in Pulse Oximetry Measurement Among Patients About to Undergo Extracorporeal Membrane Oxygenation in 2019-2020: A Retrospective Cohort Study. *Chest* 2021;doi:10.1016/j.chest.2021.09.025.
12. Henry NR, Hanson AC, Schulte PJ, Warner NS, Manento MN, Weister TJ, *et al.* Disparities in Hypoxemia Detection by Pulse Oximetry Across Self-Identified Racial Groups and Associations With Clinical Outcomes. *Crit Care Med* 2022;50:204–211.
13. Fawzy A, Wu TD, Wang K, Robinson ML, Farha J, Bradke A, *et al.* Racial and Ethnic Discrepancy in Pulse Oximetry and Delayed Identification of Treatment Eligibility Among Patients With COVID-19. *JAMA Internal Medicine* 2022;182:730–738.
14. Fawzy A, Wu TD, Wang K, Sands KE, Fisher AM, Arnold Egloff SA, *et al.* Clinical Outcomes Associated With Overestimation of Oxygen Saturation by Pulse Oximetry in Patients Hospitalized With COVID-19. *JAMA Network Open* 2023;6:e2330856.
15. Valbuena VSM, Seelye S, Sjoding MW, Valley TS, Dickson RP, Gay SE, *et al.* Racial bias and reproducibility in pulse oximetry among medical and surgical inpatients in general care in the Veterans Health Administration 2013-19: multicenter, retrospective cohort study. *BMJ* 2022;378:e069775.
16. staff-author. Pulse Oximeters Are Not Racist. *Orange County Business Journal* 2021;at <<https://www.ocbj.com/healthcare/pulse-oximeters-not-racist/>>.
17. Ly BCK, Dyer EB, Feig JL, Chien AL, Del Bino S. Research Techniques Made Simple: Cutaneous Colorimetry: A Reliable Technique for Objective Skin Color Measurement. *Journal of Investigative Dermatology* 2020;140:3-12.e1.

18. Del Bino S, Ito S, Sok J, Nakanishi Y, Bastien P, Wakamatsu K, *et al.* Chemical analysis of constitutive pigmentation of human epidermis reveals constant eumelanin to pheomelanin ratio. *Pigment Cell Melanoma Res* 2015;28:707–717.
19. 14:00-17:00. ISO 80601-2-61:2011. *ISO* at <<https://www.iso.org/standard/51847.html>>.
20. The bootstrap method in SAS: A t test example. *The DO Loop* 2018;at <<https://blogs.sas.com/content/iml/2018/06/20/bootstrap-method-example-sas.html>>.
21. Crooks CJ, West J, Morling JR, Simmonds M, Juurlink I, Briggs S, *et al.* Pulse oximeters' measurements vary across ethnic groups: An observational study in patients with Covid-19 infection. *European Respiratory Journal* 2022;doi:10.1183/13993003.03246-2021.
22. Seitz KP, Wang L, Casey JD, Markus SA, Jackson KE, Qian ET, *et al.* Pulse Oximetry and Race in Critically Ill Adults. *Crit Care Explor* 2022;4:e0758.
23. Wiles MD, El-Nayal A, Elton G, Malaj M, Winterbottom J, Gillies C, *et al.* The effect of patient ethnicity on the accuracy of peripheral pulse oximetry in patients with COVID-19 pneumonitis: a single-centre, retrospective analysis. *Anaesthesia* 2021;10.1111/anae.15581.doi:10.1111/anae.15581.
24. Ries AL, Prewitt LM, Johnson JJ. Skin color and ear oximetry. *Chest* 1989;96:287–290.
25. Bothma PA, Joynt GM, Upman J, Hon H, Mathala B, Scribante J, *et al.* Accuracy of pulse oximetry in pigmented patients. *South African Medical Journal* 1996;86:.
26. Foglia EE, Whyte RK, Chaudhary A, Mott A, Chen J, Propert KJ, *et al.* The Effect of Skin Pigmentation on the Accuracy of Pulse Oximetry in Infants with Hypoxemia. *The Journal of Pediatrics* 2017;182:375-377.e2.
27. Harris BU, Stewart S, Verma A, Hoen H, Stein ML, Wright G, *et al.* Accuracy of a portable pulse oximeter in monitoring hypoxemic infants with cyanotic heart disease. *Cardiol Young* 2019;29:1025–1029.
28. Ross PA, Newth CJL, Khemani RG. Accuracy of Pulse Oximetry in Children. *Pediatrics* 2014;133:22–29.

29. Ebmeier SJ, Barker M, Bacon M, Beasley RC, Bellomo R, Knee Chong C, *et al.* A two centre observational study of simultaneous pulse oximetry and arterial oxygen saturation recordings in intensive care unit patients. *Anaesth Intensive Care* 2018;46:297–303.



Figure 1: Distribution of objectively measured skin pigmentation at the forehead, forearm, and finger pad of participants

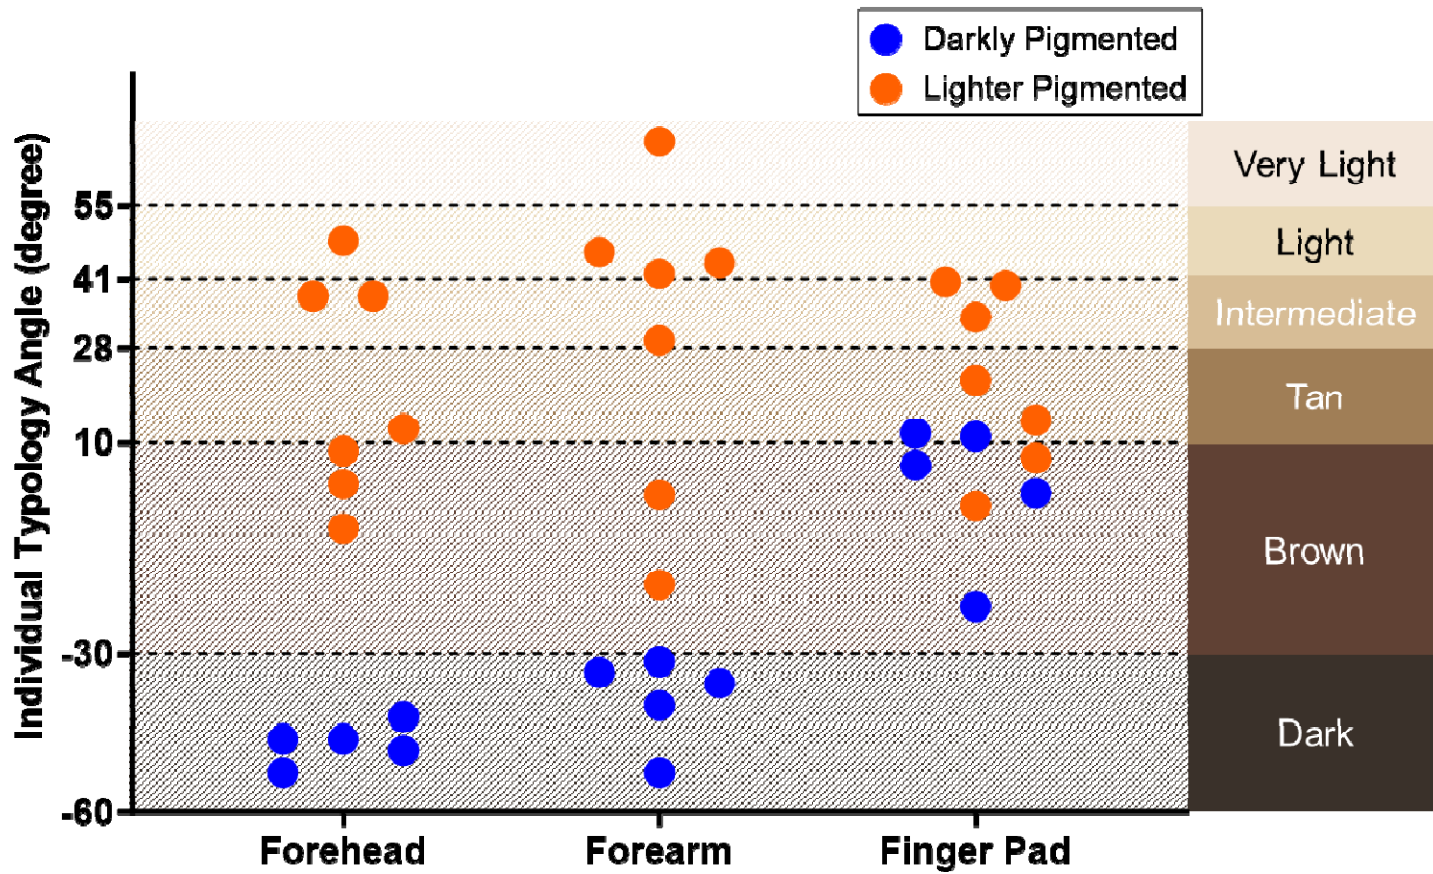

**Table 1:** Characteristics of arterial blood gas samples and paired pulse oximetry by skin pigmentation

|                                                                                           | All Patients      | Darkly Pigmented Patients           | Lighter Pigmented Patients          |
|-------------------------------------------------------------------------------------------|-------------------|-------------------------------------|-------------------------------------|
| Total ABG Samples Recorded                                                                | 400               | 119                                 | 281                                 |
| SaO <sub>2</sub> (median, IQR)                                                            | 97.2 (95.0-98.9)  | 97.2 (95.0-98.9)                    | 97.2 (95.4-98.5)                    |
| SaO <sub>2</sub> < 90%                                                                    | 11 (2.8%)         | 6 (5%)                              | 5 (1.8%)                            |
| SaO <sub>2</sub> 90-94%                                                                   | 45 (11.3%)        | 12 (10.1%)                          | 33 (11.7%)                          |
| SaO <sub>2</sub> > 94%                                                                    | 344 (86%)         | 101 (84.9%)                         | 243 (86.5%)                         |
| pH (median, IQR)                                                                          | 7.42 (7.38-7.47)  | 7.40 (7.26-7.45)                    | 7.43 (7.39-7.47)                    |
| Blood Sampling Period Identified (N)                                                      | 350               | 96                                  | 254                                 |
| Blood Sampling Duration, seconds (median, IQR)                                            | 46.1 (28.1-69)    | 43.6 (28.7-65.8)                    | 46.7 (28-70.3)                      |
| SaO <sub>2</sub> (median, IQR)                                                            | 97.1 (95.1-98.4)  | 97.0 (94.9-98.7)                    | 97.2 (95.3-98.3)                    |
| SaO <sub>2</sub> < 90%                                                                    | 9 (2.6%)          | 5 (5.2%)                            | 4 (1.6%)                            |
| SaO <sub>2</sub> 90-94%                                                                   | 44 (12.6%)        | 11 (11.5%)                          | 33 (13%)                            |
| SaO <sub>2</sub> > 94%                                                                    | 297 (84.9%)       | 80 (83.3%)                          | 217 (85.4%)                         |
| pH (median, IQR)                                                                          | 7.43 (7.39-7.47)  | 7.43 (7.31-7.45)                    | 7.43 (7.40-7.48)                    |
| Heart Rate, beats per minute (median, IQR)                                                | 90 (74-105)       | 98 (79-111.5)                       | 89 (72-101.5)                       |
| Mean Arterial Pressure, mmHg (median, IQR)                                                | 78 (70-91)        | 73.8 (70-81)                        | 80.3 (70-96)                        |
| Photoplethysmography Quality                                                              |                   |                                     |                                     |
| Good                                                                                      | 137 (39.1%)       | 48 (50%)                            | 89 (35%)                            |
| Variable                                                                                  | 207 (59.1%)       | 45 (46.9%)                          | 162 (63.8%)                         |
| Poor                                                                                      | 6 (1.7%)          | 3 (3.1%)                            | 3 (1.2%)                            |
| SpO <sub>2</sub> maximum-minimum* (median, IQR)                                           | 1 (0-1)           | 1 (0-1)                             | 1 (0-1)                             |
| 0%                                                                                        | 139 (39.7%)       | 38 (39.6%)                          | 101 (39.8%)                         |
| 1%                                                                                        | 139 (39.7%)       | 36 (37.5%)                          | 103 (40.6%)                         |
| ≥2%                                                                                       | 72 (20.6%)        | 22 (22.9%)                          | 50 (19.7%)                          |
| Blood Sampling Occurrence                                                                 |                   |                                     |                                     |
| Before Recorded SaO <sub>2</sub> Time                                                     | 276 (78.9%)       | 77 (80.2%)                          | 199 (78.4%)                         |
| During Recorded SaO <sub>2</sub> Time                                                     | 22 (6.3%)         | 4 (4.2%)                            | 18 (7.1%)                           |
| After Recorded SaO <sub>2</sub> Time                                                      | 52 (14.9%)        | 15 (15.6%)                          | 37 (14.6%)                          |
| Duration between blood sampling and recorded SaO <sub>2</sub> time, seconds (median, IQR) | 77.5 (39.6-123.8) | 81.3 (39.1-122.7)<br>Maximum: 571.3 | 74.1 (39.9-124.9)<br>Maximum: 618.2 |
| Occult Hypoxemia (SaO <sub>2</sub> <88%, SpO <sub>2</sub> ≥92%)                           | 3 (0.9%)          | 2 (2.1%)                            | 1 (0.4%)                            |
| Pulse Oximetry within 10 seconds of recorded time                                         | 360               | 100                                 | 260                                 |

| (N)                                                                                         |                  |                  |                  |
|---------------------------------------------------------------------------------------------|------------------|------------------|------------------|
| Duration between SpO <sub>2</sub> and recorded SaO <sub>2</sub> time, seconds (median, IQR) | 0 (0-1)          | 0 (0-1)          | 0 (0-1)          |
| SaO <sub>2</sub> (median, IQR)                                                              | 97.1 (95.1-98.4) | 97.0 (95.0-98.5) | 97.1 (95.2-98.3) |
| SaO <sub>2</sub> < 90%                                                                      | 10 (2.8%)        | 5 (5%)           | 5 (1.9%)         |
| SaO <sub>2</sub> 90-94%                                                                     | 44 (12.2%)       | 11 (11%)         | 33 (12.7%)       |
| SaO <sub>2</sub> > 94%                                                                      | 306 (85%)        | 84 (84%)         | 222 (85.4%)      |
| pH (median, IQR)                                                                            | 7.43 (7.39-7.47) | 7.43 (7.30-7.45) | 7.43 (7.40-7.48) |
| Occult Hypoxemia (SaO <sub>2</sub> <88%, SpO <sub>2</sub> ≥92%)                             | 2 (0.6%)         | 2 (2%)           | 0 (0%)           |

\* For 30 seconds or duration of blood sampling period, whichever is longer

**Figure 2:** Distribution (with median and range) of pulse oximeter error ( $SpO_2 - SaO_2$ ) stratified by skin pigmentation and  $SaO_2$

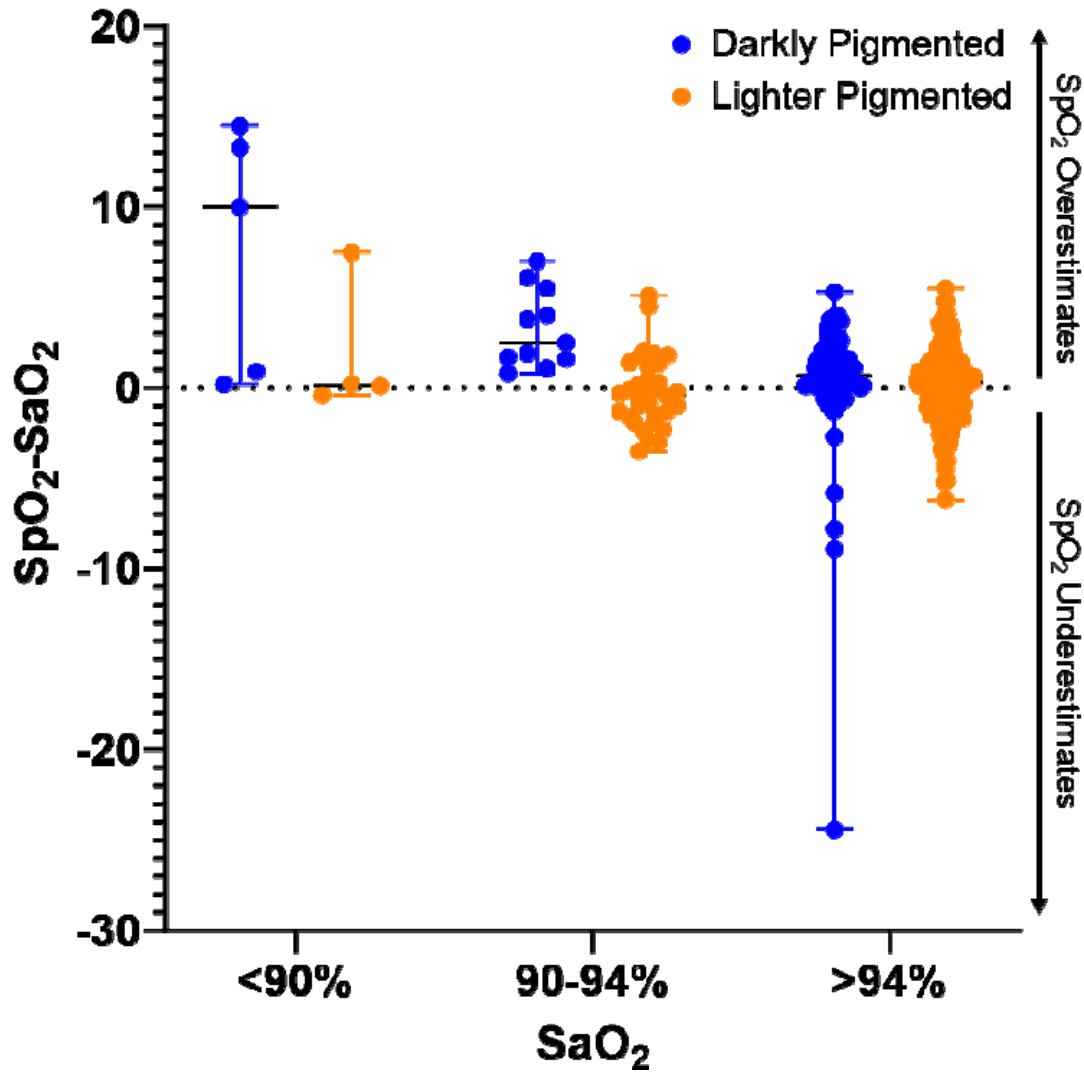

**Figure 3:** Estimated mean pulse oximeter error ( $SpO_2 - SaO_2$ ) by skin pigmentation represented by the individual typology angle (in degrees) at the (a) forehead, (b) forearm, and (c) finger pad

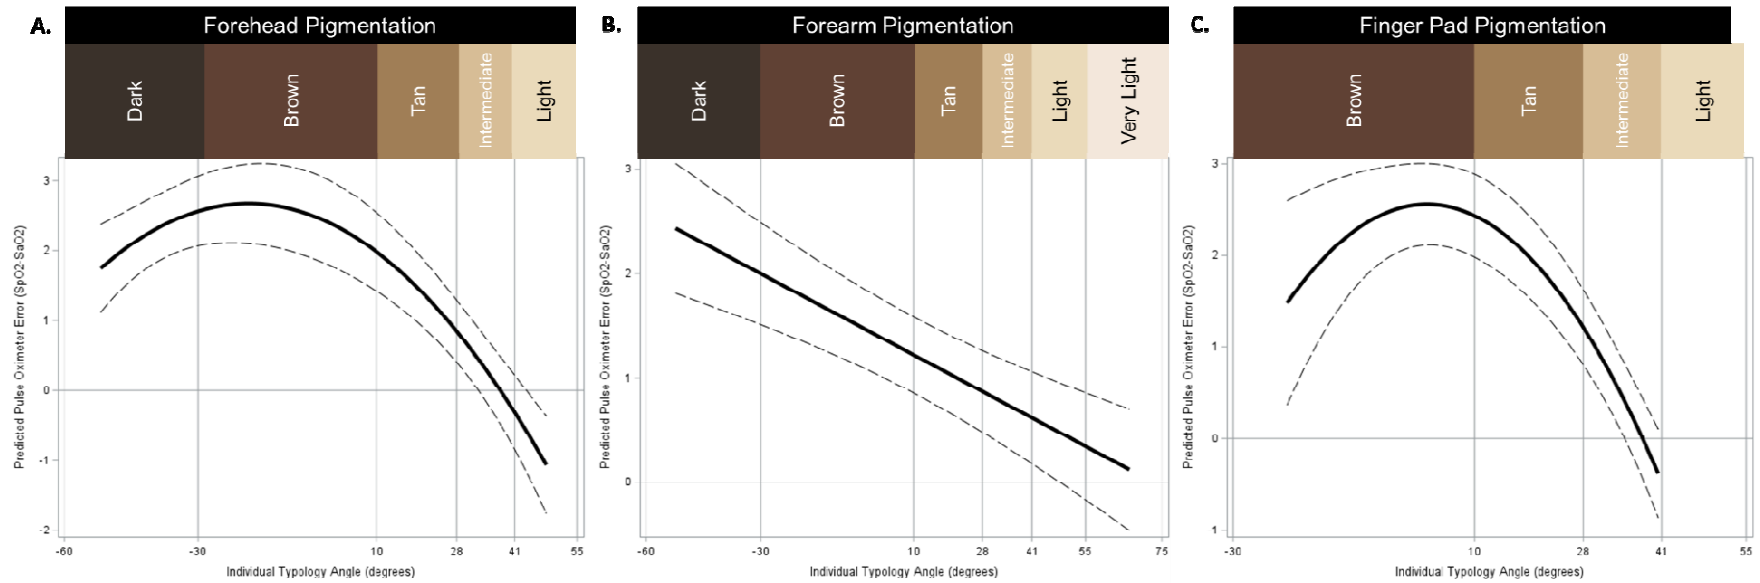

Graphs are at  $SaO_2 = 94\%$ ,  $pH=7.4$ , heart rate = 90 beats per minute, mean arterial pressure = 75 mmHg
